# Supplementary material for: Emergence of a Small-World Functional Network in Cultured Neurons
Source: PubMed Central journal article supplement (PMC3355061; doi:10.1371/journal.pcbi.1002522), 2012-05-17
Supplement: pcbi.1002522.s003.pdf [file pcbi.1002522.s003.pdf]

## Robustness of the small world result: Empirical network properties vs expected values from random and lattice null hypothesis networks

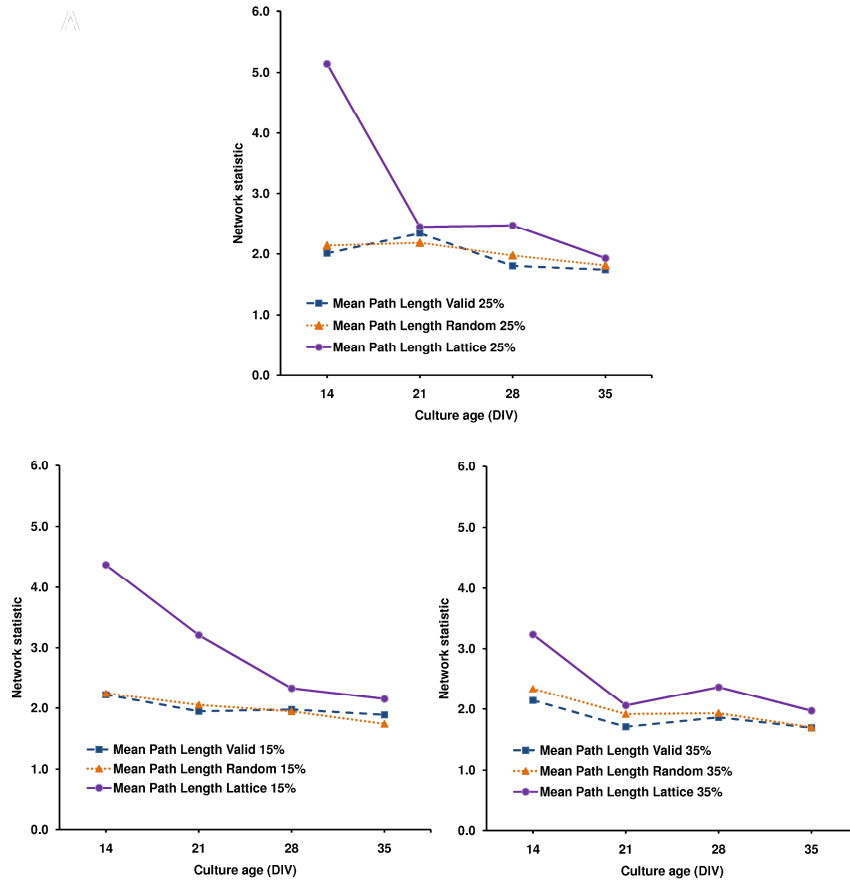

**Mean path length is close to the value expected for a random network, regardless of persistent link definition threshold.**

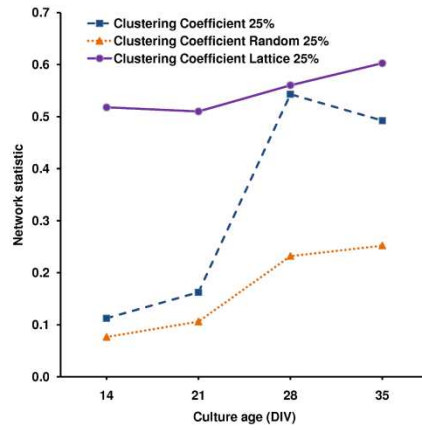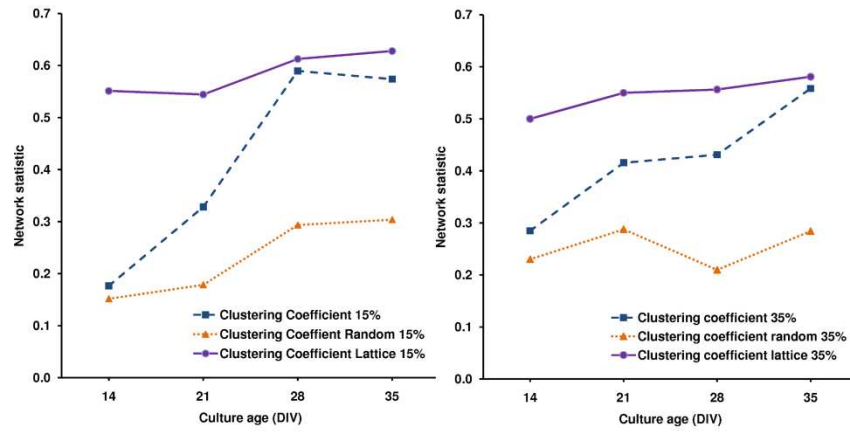

**Clustering coefficient shows increasing trend towards the value expected for a lattice, regardless of persistent link definition threshold.**
