# Supplementary material for: Emergence of a Small-World Functional Network in Cultured Neurons
Source: PubMed Central journal article supplement (PMC3355061; doi:10.1371/journal.pcbi.1002522), 2012-05-17
Supplement: pcbi.1002522.s004.pdf [file pcbi.1002522.s004.pdf]

## Global efficiency based small-worldness

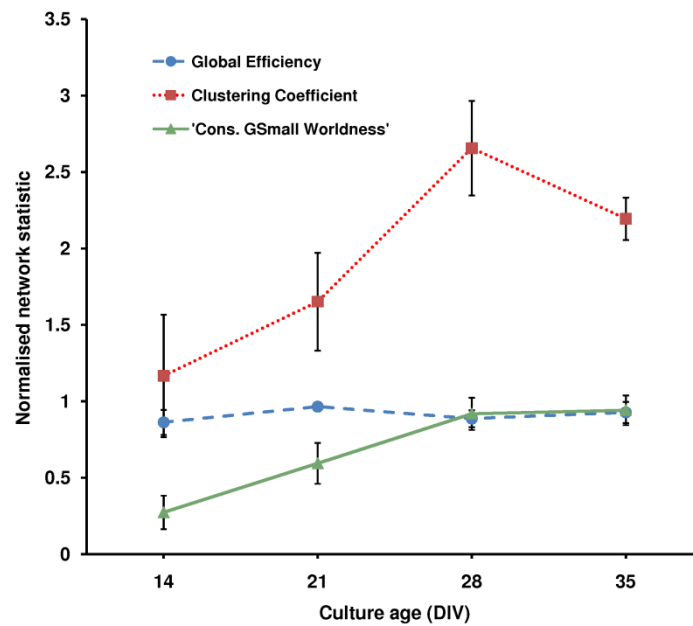

### **Global efficiency, clustering coefficient and conservative global-efficiency based 'small-worldness' of persistent networks as a function of culture age.**

Averages ( $n = 4-6$ ), were normalized as follows: Global efficiency ( $E$ ) and clustering coefficient ( $C$ ) were normalized against the expected value from an equivalent population of random networks ( $n = 50$ ), therefore clustering coefficient is the same as in Figure 3 main text. Small-worldness was calculated conservatively as  $(C_{\text{real}} / C_{\text{lattice}}) / (E_{\text{real}} / E_{\text{rand}})$ . Error bars represent  $\pm$  s.e.m. The global efficiency-based small-worldness increased with culture age (as per the mean path length based small-worldness).
