# Supplementary material for: Emergence of a Small-World Functional Network in Cultured Neurons
Source: PubMed Central journal article supplement (PMC3355061; doi:10.1371/journal.pcbi.1002522), 2012-05-17
Supplement: pcbi.1002522.s006.pdf [file pcbi.1002522.s006.pdf]

## Conservative small-worldness: Guarding against high small-worldness values when clustering coefficient is low

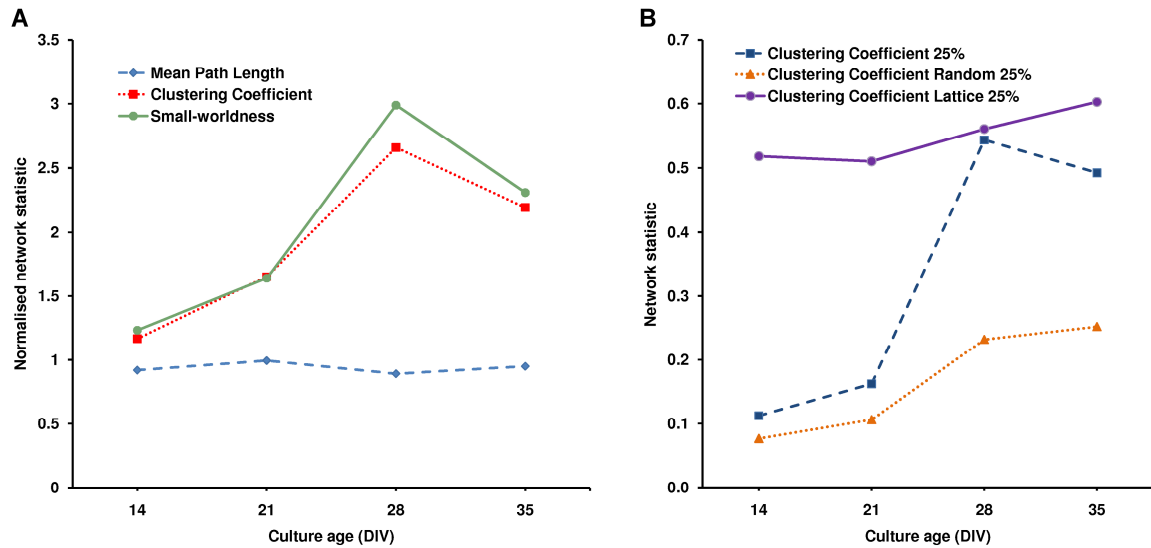

**In some cases, small-worldness is met despite the clustering coefficient being far from the value expected for a lattice.**

Panel A: All values are normalised against the expected value from a population of equivalent random networks ( $n=50$ ) - as per the typical small-world calculation. Panel B: The raw (un-normalised) network properties are compared to those expected from equivalent random ( $n=50$ ) and lattice networks.
