# Supplementary material for: Emergence of a Small-World Functional Network in Cultured Neurons
Source: PLOS journal article supplement (doi:10.1371/journal.pcbi.1002522), 2012-05-17
Supplement: S8 (10.1371/journal.pcbi.1002522.s008) [file journal.pcbi.1002522.s008]

301 Moved Permanently

# Moved Permanently

The document has moved here.

---

Apache Server at www.ploscompbiol.org Port 80
